# Supplementary material for: [Co5(µ3-OH)2(btec)2(bpp)]n: a three-dimensional homometallic molecular metamagnet built from the mixed hydroxide/carboxylate-bridged ferrimagnetic-like chains
Source: Royal Society of Chemistry journal article supplement (doi:10.1039/b700041c), 2007-01-01
Supplement: b700041c.pdf [file b700041c.pdf]

# $[\text{Co}_5(\mu_3\text{-OH})_2(\text{btec})_2(\text{bpp})]_n$ : A Three-Dimensional Homometallic Molecular Metamagnet Built from the Mixed Hydroxide/Carboxylate-Bridged Ferrimagnetic-like Chains

Hong-Peng Jia, Wei Li, Zhan-Feng Ju, and Jie Zhang\*

*State Key Laboratory of Structural Chemistry, Fujian Institute of Research on the Structure of Matter, Chinese Academy of Sciences, Fujian, Fuzhou, 350002, China.  
Fax: 86 0591 83710051; Tel: 86 0591 83792871; E-mail: [zhangjie@fjirsm.ac.cn](mailto:zhangjie@fjirsm.ac.cn)*

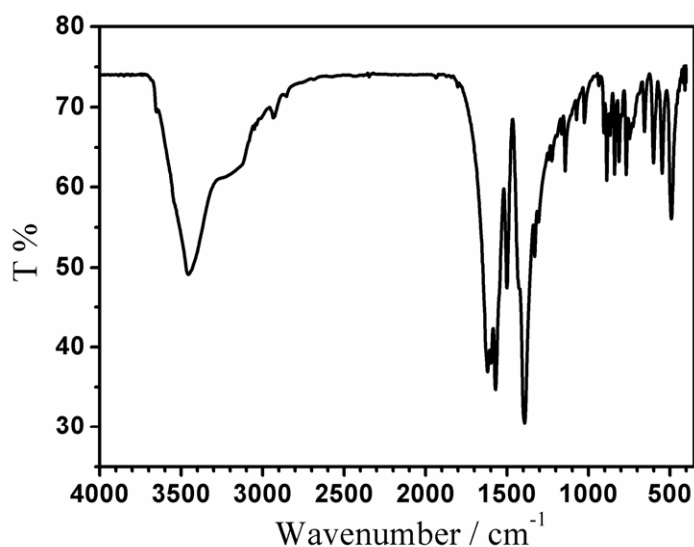

**Fig. S1** FT-IR spectrum of **1**.

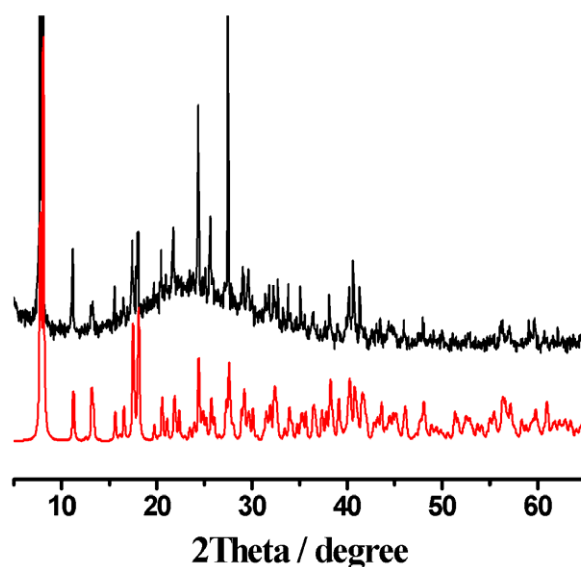

**Fig.S2** Simulated (red line) and experimental (black line) XRPD data of **1**.

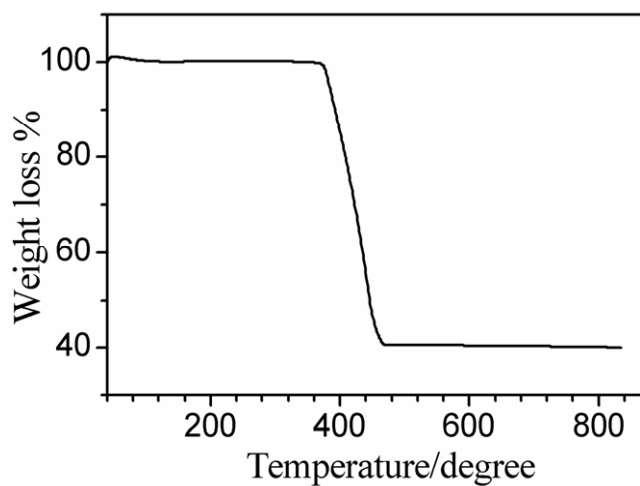

**Fig. S3** TGA curve for **1**.

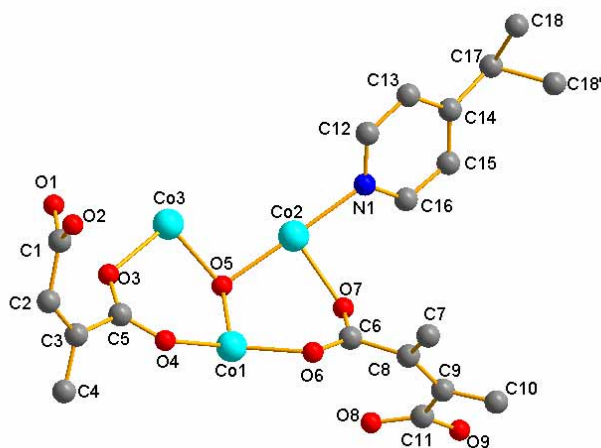

**Fig. S4** The asymmetric unit of **1**. All H atoms and lattice water molecule have been omitted for clarity.

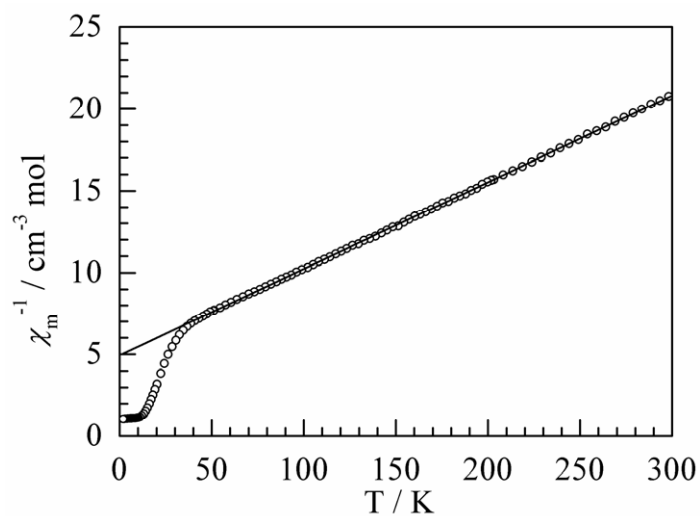

**Fig. S5** Plot of  $\chi_m^{-1}$  vs  $T$  in the range of 2-300 K for **1**, the solid line is the linear fitting based on the Curie – Weiss law.

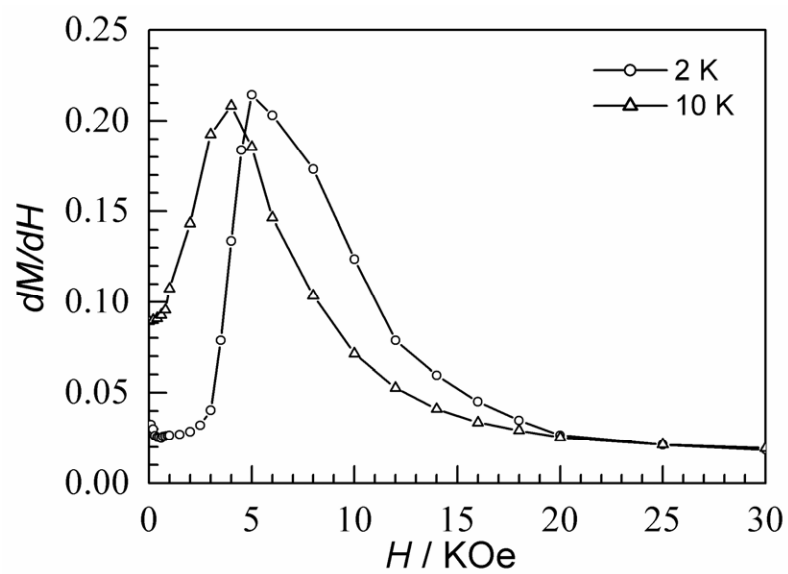

**Fig. S6** Field dependence magnetization of **1** plotted based on  $dM/dH$  derivative.

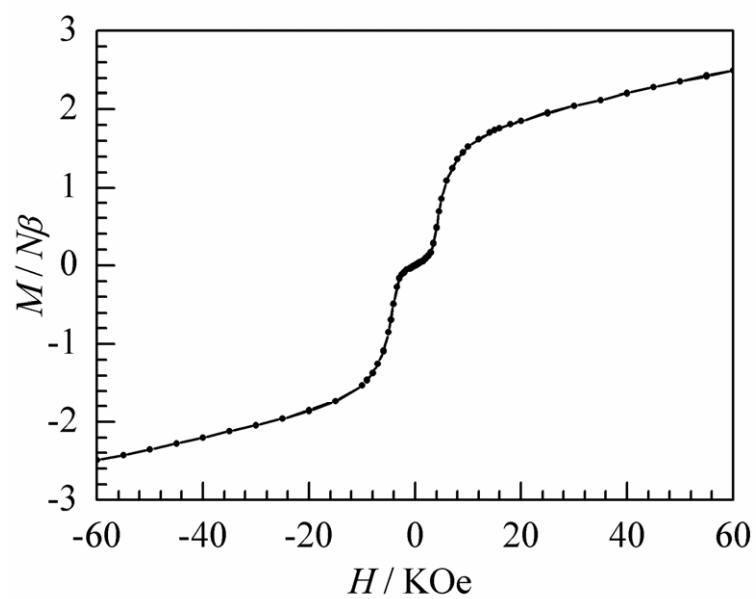

**Fig. S7** Hysteresis loop for **1** at 5 K.
